# Supplementary material
Source: PubMed Central journal article supplement (PMC3271910)
Supplement: 1114834109_pnas.201114834SI.pdf [file 1114834109_pnas.201114834SI.pdf]

# Supporting Information

Suen and Baldwin 10.1073/pnas.1114834109

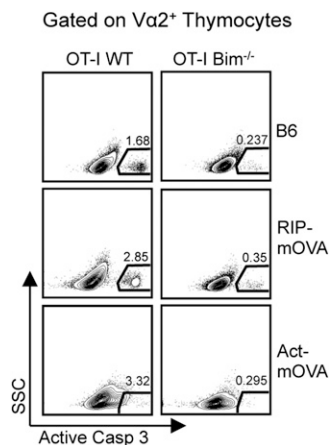

**Fig. S1.** Bim is required for caspase 3-mediated apoptosis. Active cleaved caspase 3 profile of Vα2<sup>+</sup> thymocytes from OT-I→B6 (*n* = 7), OT-I→recipients that express membrane bound chicken ovalbumin under control of the rat insulin promoter (Rip-mOVA) (*n* = 8), OT-I Bim<sup>-/-</sup>→B6 (*n* = 8), OT-I Bim<sup>-/-</sup>→RIP-mOVA (*n* = 7), OT-I→Act-mOVA (*n* = 3), and OT-I Bim<sup>-/-</sup>→Act-mOVA (*n* = 3) chimeras. Data are representative of the indicated number of samples.

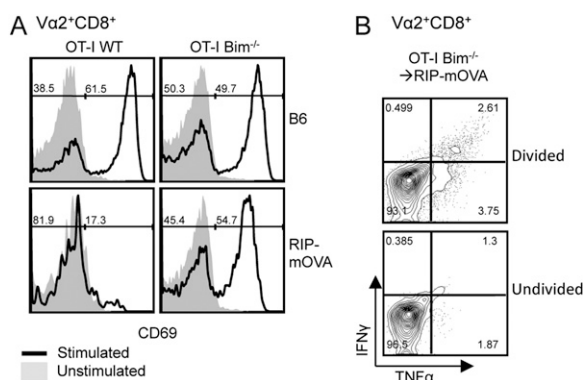

**Fig. S2.** Unresponsive T cells from OT-I Bim<sup>-/-</sup>→Rip-mOVA chimeras encounter antigen. (A) CD69 histogram of unstimulated (solid gray) and stimulated Vα2<sup>+</sup> CD8<sup>+</sup> T cells from OT-I→B6 (*n* = 7), OT-I→RIP-mOVA (*n* = 8), OT-I Bim<sup>-/-</sup>→B6 (*n* = 8), and OT-I Bim<sup>-/-</sup>→RIP-mOVA (*n* = 7) chimeras 1 d poststimulation with congenic OVA pulsed splenocytes. (B) Cytokine production upon restimulation at day 5 of dividing and nondividing populations from OT-I Bim<sup>-/-</sup>→RIP-mOVA chimeras. Data are representative of the indicated number of samples over at least six experiments.

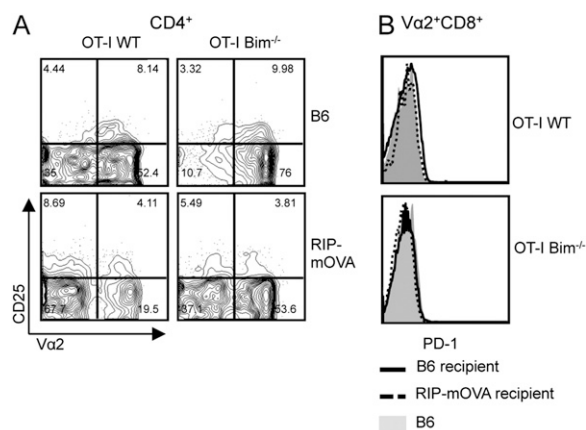

**Fig. S3.** Unresponsive phenotype is not due to increases in CD25-expressing cells or up-regulation of PD-1. (A) CD25 by V $\alpha$ 2 profile of CD4 splenocytes from OT-I $\rightarrow$ B6 ( $n = 7$ ), OT-I $\rightarrow$ RIP-mOVA ( $n = 8$ ), OT-I Bim $^{-/-}$  $\rightarrow$ B6 ( $n = 8$ ), OT-I Bim $^{-/-}$  $\rightarrow$ RIP-mOVA ( $n = 7$ ), OT-I $\rightarrow$ Act-mOVA ( $n = 3$ ), and OT-I Bim $^{-/-}$  $\rightarrow$ Act-mOVA ( $n = 3$ ) chimeras. (B) PD-1 expression by V $\alpha$ 2 $^{+}$ CD8 $^{+}$  T cells from B6 (solid gray), B6 chimeras (solid line), and RIP-mOVA chimeras (dashed lines). Data are representative of the indicated number of samples over at least six experiments.
